# Supplementary material for: Energetic performances of the metal–organic framework ZIF-8 obtained using high pressure water intrusion–extrusion experiments
Source: Royal Society of Chemistry journal article supplement (doi:10.1039/c3cp00142c), 2013-01-01
Supplement: c3cp00142c.pdf [file c3cp00142c.pdf]

# Energetic Performances of the Metal-Organic Framework ZIF-8 by High Pressure Water Intrusion-Extrusion Experiments

*Guillaume Ortiz, Habiba Nouali, Claire Marichal, Gérald Chaplais, Joël Patarin*

Equipe Matériaux à Porosité Contrôlée (MPC), Institut de Sciences des Matériaux de Mulhouse (IS2M), UMR 7361 CNRS-UHA, Institut Jean-Baptiste Donnet, 3 bis rue Alfred Werner 68093 Mulhouse, France

Corresponding authors: [gerald.chaplais@uha.fr](mailto:gerald.chaplais@uha.fr); [joel.patarin@uha.fr](mailto:joel.patarin@uha.fr)

## Table of contents

|                                                                                                 |   |
|-------------------------------------------------------------------------------------------------|---|
| Water Intrusion-Extrusion Experiments .....                                                     | 2 |
| Powder X-ray Diffraction .....                                                                  | 2 |
| Thermogravimetric Analyses .....                                                                | 2 |
| Scanning Electron Microscopy .....                                                              | 2 |
| Nitrogen Adsorption-Desorption Measurements .....                                               | 2 |
| Figure S1. Water intrusion-extrusion diagrams of the “ZIF-8-water” system in linear scale ..... | 3 |
| Figure S2. Mercury porosimetry on ZIF-8.....                                                    | 3 |
| Figure S3. Powder X-ray diffraction patterns of ZIF-8. ....                                     | 4 |
| Figure S4. SEM images of ZIF-8.....                                                             | 4 |
| Figure S5. TG curves under air of ZIF-8. ....                                                   | 5 |
| Figure S6. Nitrogen adsorption-desorption isotherms. ....                                       | 5 |

### Water Intrusion-Extrusion Experiments

The intrusion-extrusion experiments of water on ZIF-8 samples were performed at room temperature using a modified mercury porosimeter (Micromeritics Model Autopore IV). ZIF-8 powder was directly introduced in the cell. This latter, which contains the “MOF-water” system, consists in a polypropylene cylinder of 2 cm<sup>3</sup> sealed by a mobile piston. Then this cell is introduced in a 15 cm<sup>3</sup> penetrometer of the porosimeter which is filled with mercury. The volume variation is determined through a capacity measurement which depends on the mercury height in the capillary tube of the penetrometer. The experimental intrusion-extrusion curve is obtained after correction of the curve corresponding to the compressibility of pure water. The value of the intrusion ( $P_{int}$ ) and extrusion ( $P_{ext}$ ) pressures correspond to the pressure where the variation of the intruded / extruded volume is maximal. Pressure is expressed in MPa, and volume variation in mL per gram of sample. The experimental error is estimated to 1 % on the pressure and on the volume.

### Powder X-ray Diffraction

The powder XRD patterns of the different samples was collected between 5 and 50° ( $2\theta$ ) (step 0.01°) on a STOE STADI-P diffractometer in Debye-Scherrer geometry, equipped with a linear position-sensitive detector (6° in  $2\theta$ ) and employing Ge monochromated CuK $\alpha_1$  radiation ( $\lambda = 1.5406$  Å).

### Thermogravimetric Analyses

The measures were performed under air until 900 °C (rate of 2 °C min<sup>-1</sup>) using a METTLER-TOLEDO TGA 851e apparatus.

### Scanning Electron Microscopy

The size and the morphology of ZIF-8 nanoparticles were determined using a Philips XL 30 FEG microscope.

### Nitrogen Adsorption-Desorption Measurements

Nitrogen adsorption-desorption isotherms were carried out using a Micromeritics ASAP 2420 apparatus. Prior to the adsorption measurements, samples were outgassed at 90 °C overnight under vacuum. BET surface ( $S_{BET}$ ) areas for ZIF-8, before and after water intrusion-extrusion experiments, were calculated according to the criteria given in the literature,<sup>1, 2</sup> namely in the  $0.001 \leq P/P_0 \leq 0.018$  range. Langmuir surface ( $S_{Lang}$ ) areas were calculated by the apparent Langmuir equations assuming a monolayer coverage of N<sub>2</sub> and a cross-sectional area of 16.2 Å<sup>2</sup> per molecule in the same range as BET surface. The micropore volume ( $V_{micro}$ ) was determined by  $t$ -plot method.

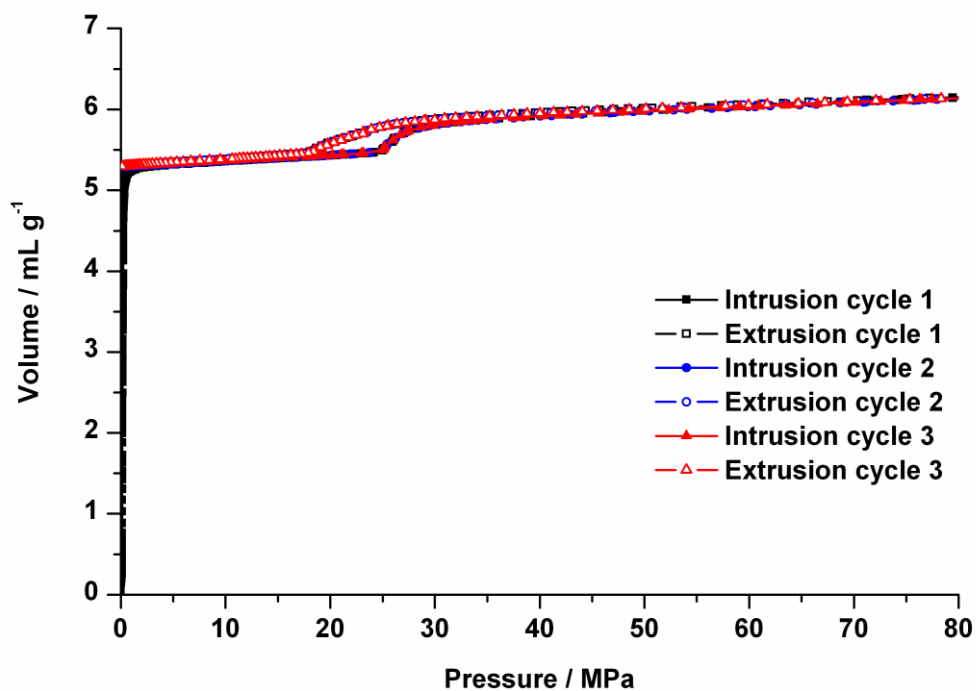

**Figure S1.** Water intrusion-extrusion diagrams of the “ZIF-8-water” system in linear scale for pressure values.

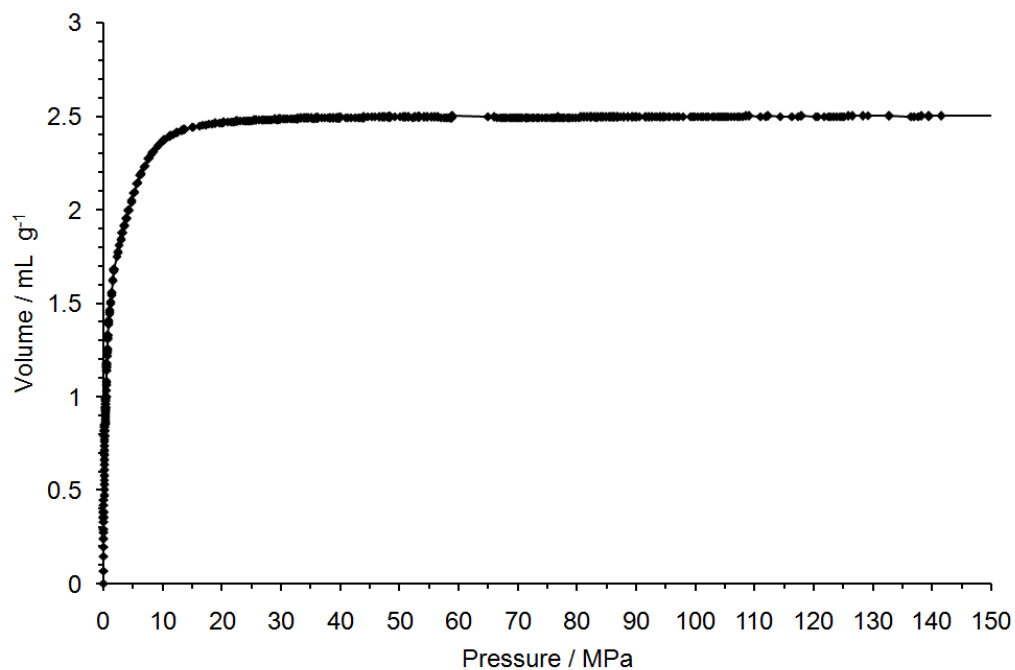

**Figure S2.** Mercury porosimetry on ZIF-8.

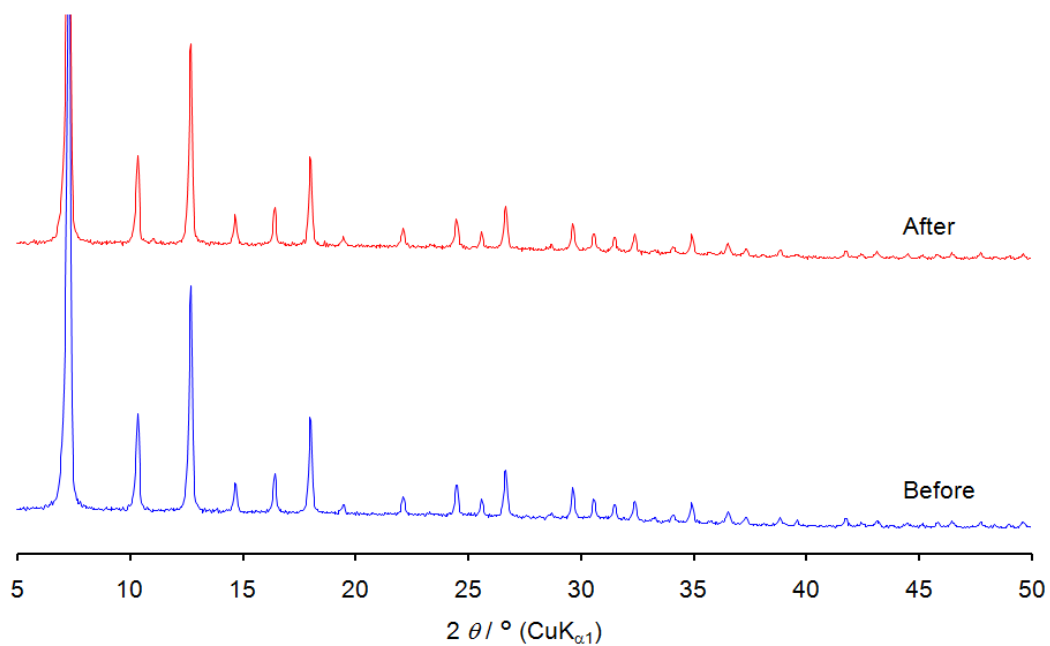

**Figure S3.** Powder X-ray diffraction patterns of ZIF-8 before (blue line) and after (red line) three water intrusion-extrusion cycles.

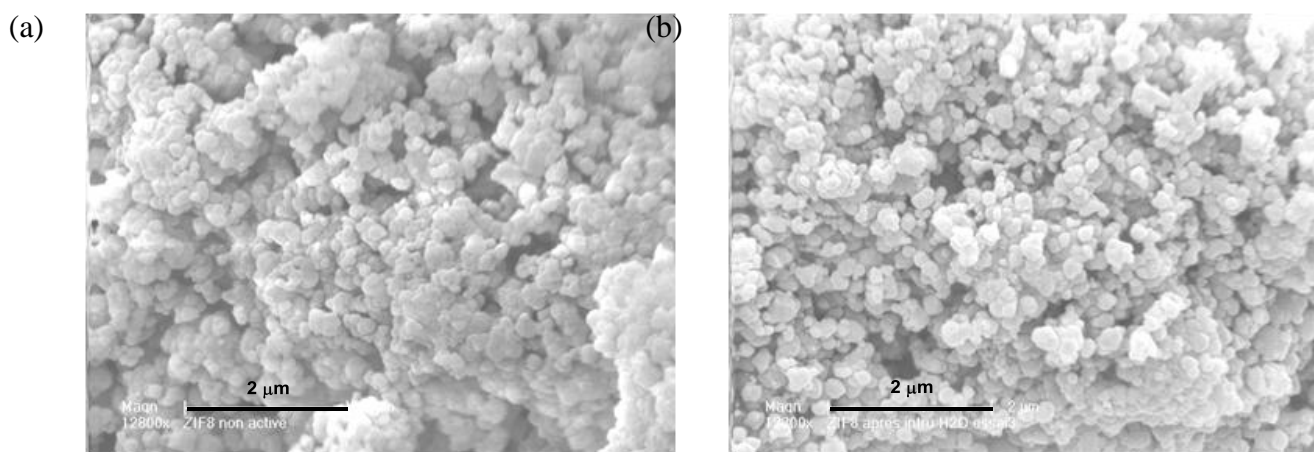

**Figure S4.** SEM images of ZIF-8 before (a) and after (b) three water intrusion-extrusion cycles.

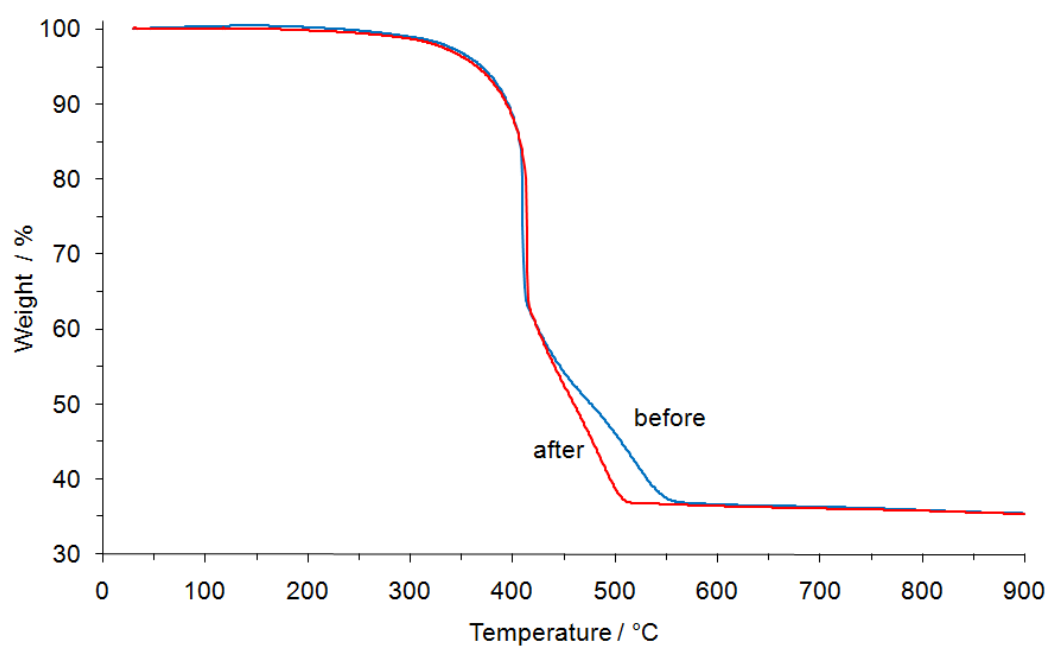

**Figure S5.** TG curves under air of ZIF-8 before (blue line) and after (red line) three water intrusion-extrusion cycles.

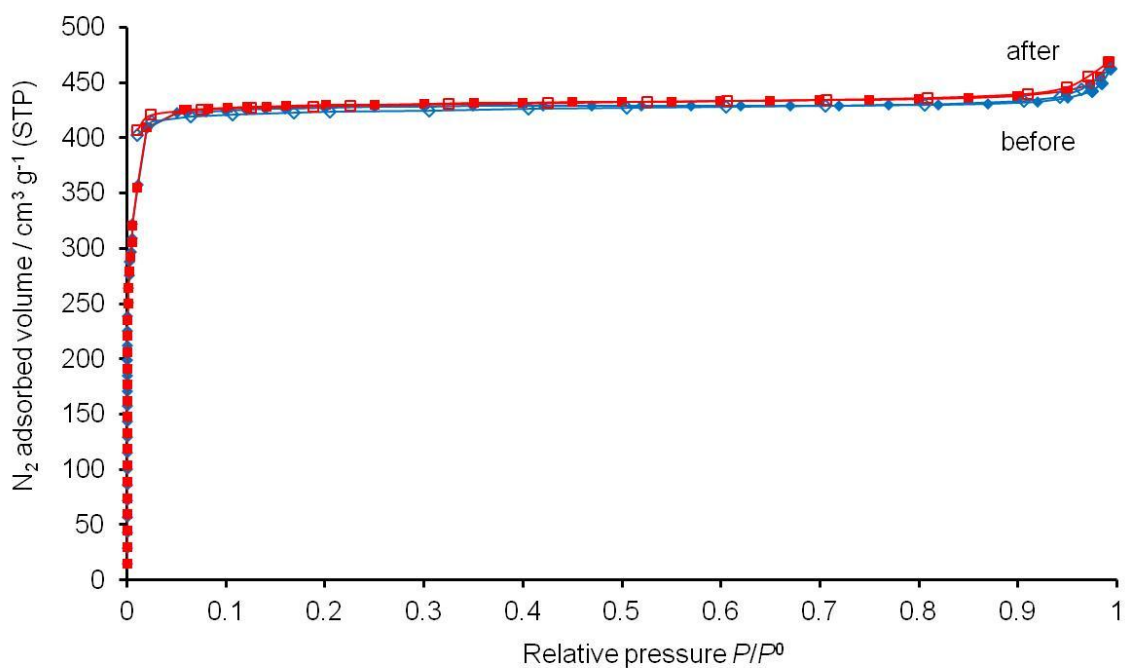

**Figure S6.** Nitrogen adsorption (full square)-desorption (empty square) isotherms of ZIF-8 before (blue line) and after (red line) water intrusion-extrusion experiments.

## References

1. J. Rouquerol, P. Llewellyn and F. Rouquerol, *Stud. Surf. Sci. Catal.*, 2007, **160**, 49.
2. K. S. Walton and R. Q. Snurr, *J. Am. Chem. Soc.*, 2007, **129**, 8552.
